# Supplementary material
Source: PubMed Central journal article supplement (PMC2689773)
Supplement: M800501-MCP200_1.pdf [file M800501-MCP200_1.pdf]

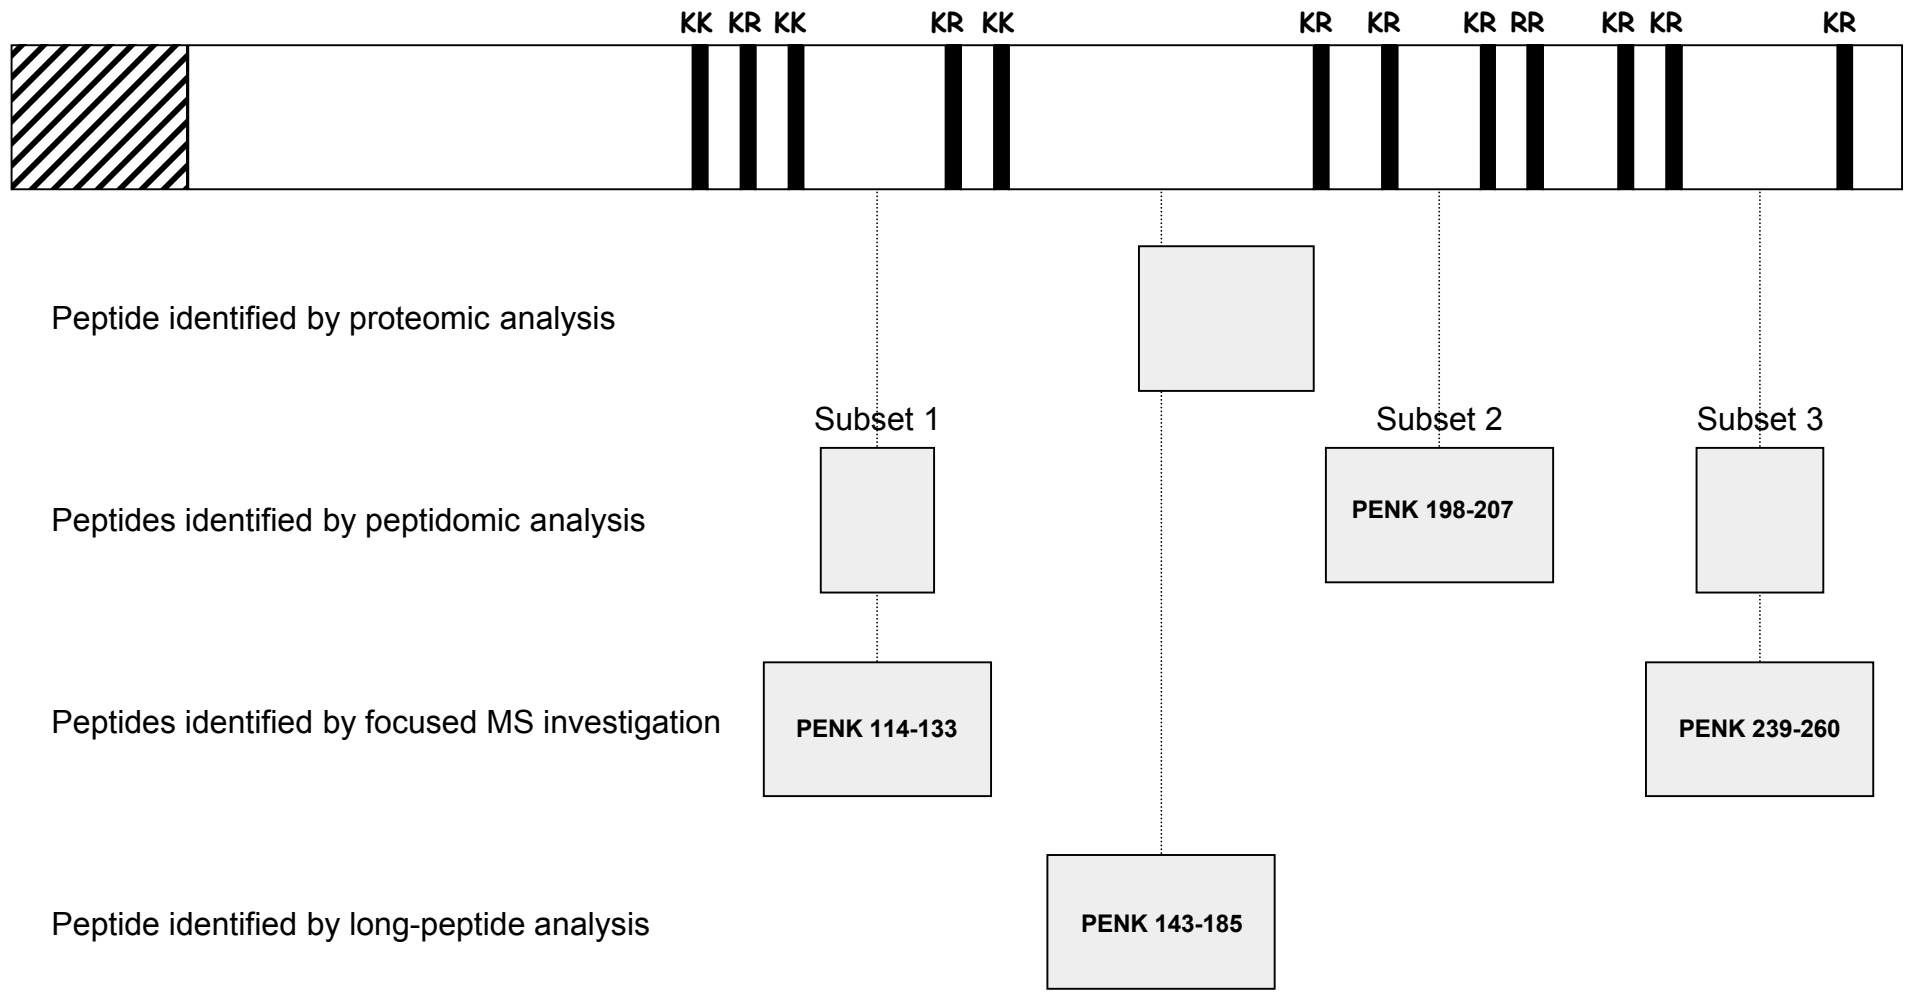

**Supplemental Fig. 1. Characterization of PENK-derived peptides in striatal microdialysate.** On the Proenkephalin A precursor, the signal peptide is indicated by the hatched area, and dibasic cleavage sites are in dark. Identified PENK-derived peptides are displayed as grey boxes. Each subset of the peptidomic analysis consists of 2-10 truncated peptides (see Supplemental Table 2).
