# Supplementary material
Source: PubMed Central journal article supplement (PMC2689773)
Supplement: M800501-MCP200_2.pdf [file M800501-MCP200_2.pdf]

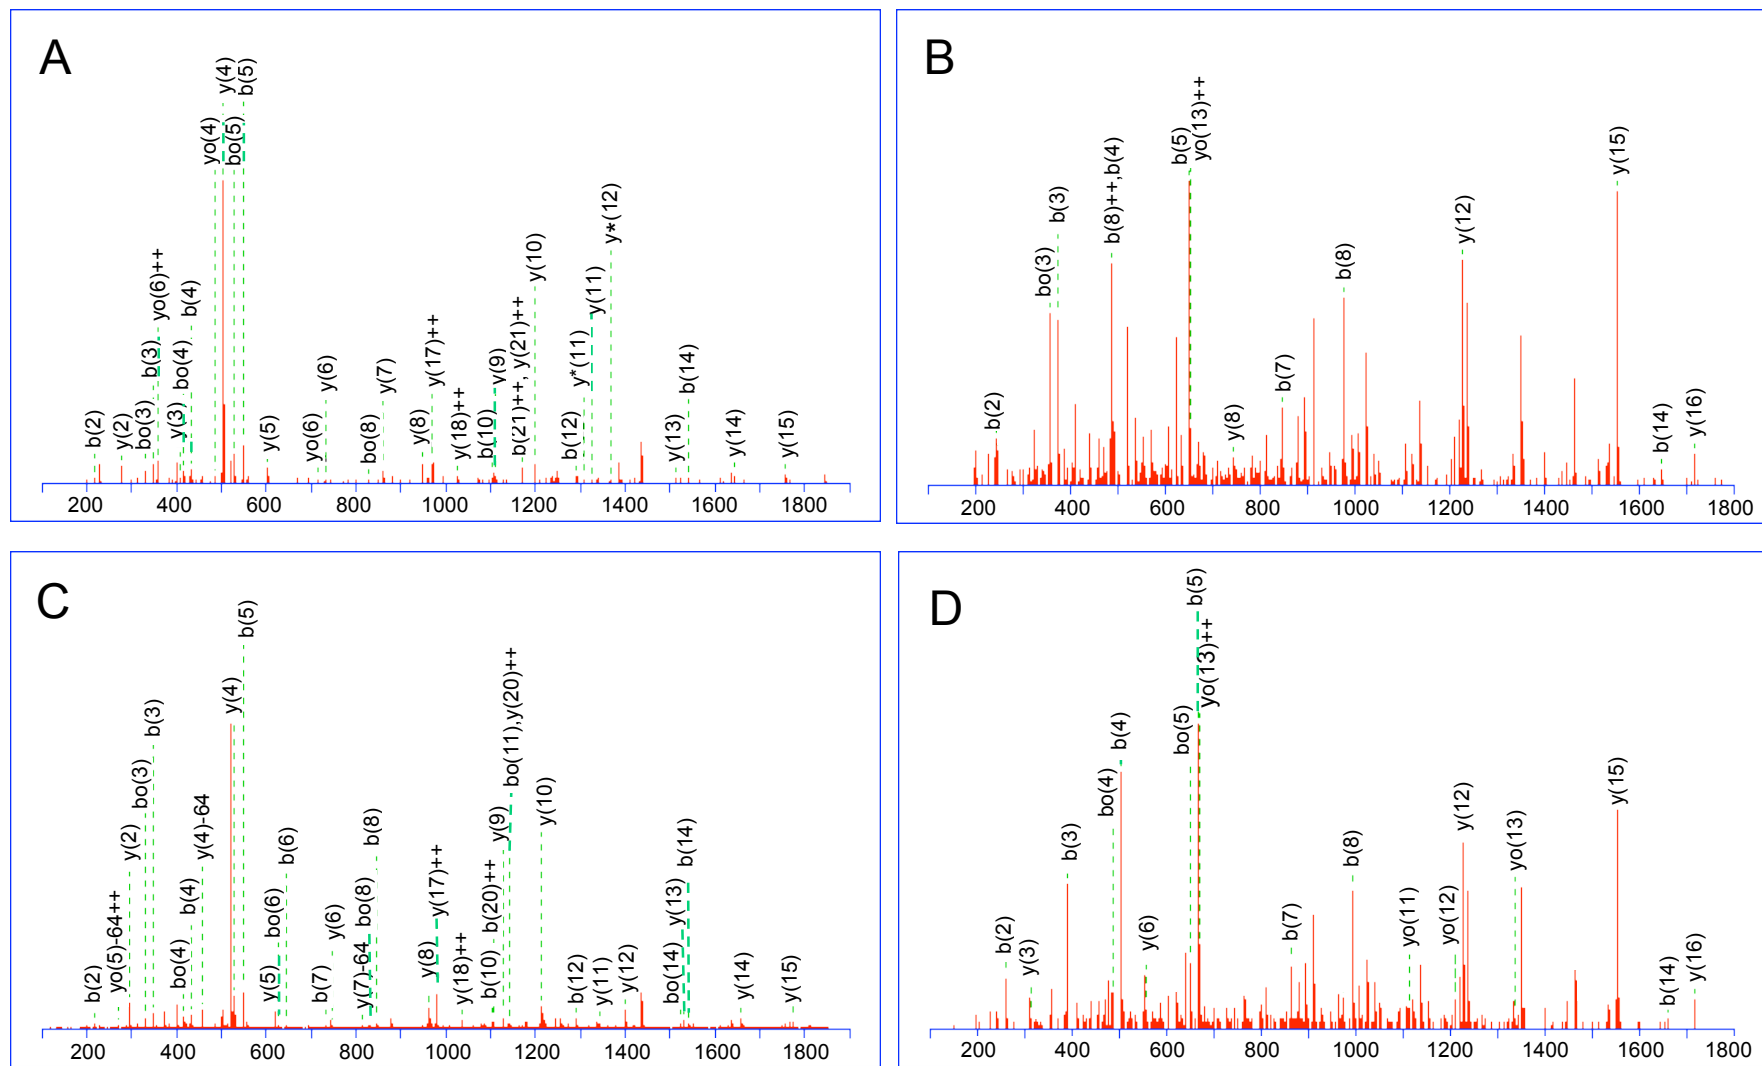

**Supplemental Fig. 2.** Q-TOF MS/MS spectra for endogenous PENK 239-260 (A) and PENK 114-133 (B), and synthetic PENK 239-260 (C) and PENK 114-133 (D).
